# Supplementary material
Source: Springer Nature journal article supplement (https://www.springermedizin.de/resource/supplementary/12888_2011_836_MOESM1_ESM.pdf/9478908)

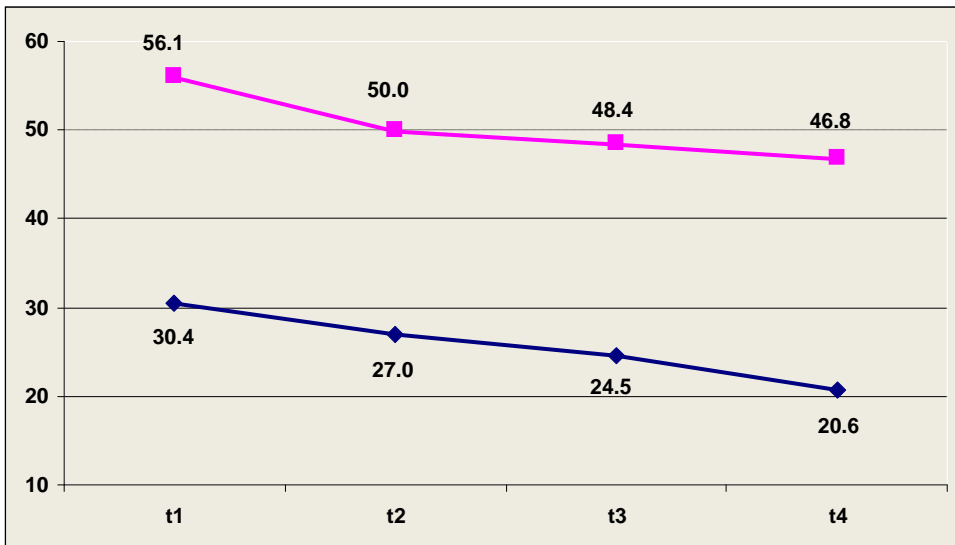

- PTSD Checklist (PCL) Total Score
- ◆— Beck Depression Inventory (BDI) Total Score

Supplement: MOESM1 [file 9478908]
